# Supplementary material
Source: HighWire-hosted journal article supplement (https://erj.ersjournals.com/content/54/3/1900541)
Supplement: inline-supplementary-material-1 [file inline-supplementary-material-1.pdf]

**Supplementary table S1: Characteristics of included studies**

| <b>Study</b>                 | <b>Region</b>         | <b>Economy</b>                         | <b>Study type</b>                                     | <b>Sample size *</b> | <b>Population studied included cases of TB, paediatric or post-surgical empyema</b> | <b>Comorbidity reported</b> | <b>Outcome reported</b> |
|------------------------------|-----------------------|----------------------------------------|-------------------------------------------------------|----------------------|-------------------------------------------------------------------------------------|-----------------------------|-------------------------|
| Abu-Daff et al., 2013        | North America         | High income                            | Retrospective observational cohort                    | 163                  | N                                                                                   | N                           | Y                       |
| Ahmed et al., 2006           | North America         | High income                            | Prospective observational cohort (population based)   | 24                   | N                                                                                   | Y                           | Y                       |
| Ahmed et al., 2016           | Middle East           | Low, low-middle or upper-middle income | Randomised controlled trial                           | 78                   | N                                                                                   | Y                           | Y                       |
| Akhan et al., 2007           | Middle East           | Low, low-middle or upper-middle income | Retrospective observational cohort                    | 93                   | Y                                                                                   | N                           | Y                       |
| Alegre et al., 2002          | South Europe          | High income                            | Retrospective observational cohort                    | 36                   | N                                                                                   | Y                           | N                       |
| Alemán et al., 2015          | South Europe          | High income                            | Randomised controlled trial                           | 99                   | N                                                                                   | Y                           | Y                       |
| Andrade-Alegre et al., 2008) | Central South America | High income                            | Retrospective observational cohort                    | 33                   | Y                                                                                   | Y                           | Y                       |
| Anstadt et al., 2003         | North America         | High income                            | Retrospective observational cohort                    | 93                   | N                                                                                   | Y                           | Y                       |
| Asai et al., 2017            | East Asia             | High income                            | Retrospective observational cohort                    | 48                   | N                                                                                   | Y                           | Y                       |
| Baek et al., 2017            | East Asia             | High income                            | Retrospective observational cohort                    | 149                  | Y                                                                                   | Y                           | Y                       |
| Bagheri et al., 2013         | Middle East           | Low, low-middle or upper-middle income | Randomised controlled trial                           | 40                   | Y                                                                                   | N                           | Y                       |
| Bagheri et al., 2016         | Middle East           | Low, low-middle or upper-middle income | Prospective observational cohort                      | 50                   | Y                                                                                   | N                           | Y                       |
| Barmparas et al., 2009       | North America         | High income                            | Retrospective observational cohort (population based) | 57                   | N                                                                                   | N                           | Y                       |
| Banga et al., 2004           | India                 | Low, low-middle or upper-middle income | Retrospective observational cohort                    | 31                   | Y                                                                                   | Y                           | Y                       |
| Bar et al., 2010             | Middle East           | High income                            | Retrospective observational cohort                    | 119                  | Y                                                                                   | Y                           | Y                       |
| Barthwal et al., 2004        | India                 | Low, low-middle or upper-middle income | Prospective observational cohort                      | 30                   | Y                                                                                   | N                           | Y                       |

|                          |               |                                        |                                    |     |   |   |   |
|--------------------------|---------------|----------------------------------------|------------------------------------|-----|---|---|---|
| Bilgin et al., 2006      | South Europe  | Low, low-middle or upper-middle income | Randomised controlled trial        | 70  | N | N | Y |
| Birkenkamp et al., 2016  | North America | High income                            | Retrospective observational cohort | 91  | N | Y | Y |
| Bongiolatti et al., 2017 | South Europe  | High income                            | Retrospective observational cohort | 64  | Y | Y | Y |
| Bouros et al., 2002      | South Europe  | High income                            | Retrospective observational cohort | 20  | N | Y | Y |
| Boyanova et al., 2004    | East Europe   | Low, low-middle or upper-middle income | Retrospective observational cohort | 198 | Y | Y | N |
| Brutsche et al., 2005    | West Europe   | High income                            | Retrospective observational cohort | 127 | Y | N | Y |
| Casali et al., 2009      | South Europe  | High income                            | Retrospective observational cohort | 119 | Y | N | Y |
| Caviezel et al., 2017    | West Europe   | High income                            | Diagnostic accuracy study          | 38  | N | Y | Y |
| Chalmers et al., 2009    | North Europe  | High income                            | Prospective observational cohort   | 92  | N | Y | Y |
| Chan et al., 2007        | East Asia     | High income                            | Prospective observational cohort   | 77  | Y | Y | Y |
| Chen et al., 2000        | East Asia     | High income                            | Retrospective observational cohort | 171 | Y | Y | Y |
| Chen et al., 2007        | East Asia     | High income                            | Retrospective observational cohort | 102 | N | Y | Y |
| Chen et al., 2009        | East Asia     | High income                            | Retrospective observational cohort | 141 | N | Y | Y |
| Chen et al., 2014        | East Asia     | High income                            | Retrospective observational cohort | 602 | N | Y | Y |
| Chen and Hsu, 2013       | East Asia     | High income                            | Retrospective observational cohort | 141 | N | N | Y |
| Cheng and Vintch, 2005   | North America | High income                            | Retrospective observational cohort | 72  | N | Y | Y |
| Chu et al., 2001         | North America | High income                            | Retrospective observational cohort | 34  | N | N | Y |
| Davoodabadi et al., 2008 | Middle East   | Low, low-middle or upper-middle income | Retrospective observational cohort | 34  | Y | N | Y |
| de Souza et al., 2000    | North America | High income                            | Retrospective observational cohort | 58  | Y | Y | Y |

|                                 |                       |                                        |                                                       |        |   |   |   |
|---------------------------------|-----------------------|----------------------------------------|-------------------------------------------------------|--------|---|---|---|
| Desai and Amadi, 2001           | Africa                | Low, low-middle or upper-middle income | Retrospective observational cohort                    | 85     | Y | Y | Y |
| Diacon et al., 2004             | Africa                | Low, low-middle or upper-middle income | Randomised controlled trial                           | 53     | Y | Y | Y |
| El Solh et al., 2007            | North America         | High income                            | Retrospective observational cohort                    | 169    | N | Y | Y |
| Eren et al., 2008               | Middle East           | Low, low-middle or upper-middle income | Retrospective observational cohort                    | 71     | Y | N | Y |
| Farjah et al., 2007             | North America         | High income                            | Retrospective observational cohort (population based) | 4424   | N | N | Y |
| Finley et al., 2008             | North America         | High income                            | Retrospective observational cohort (population based) | 11294  | Y | N | Y |
| Froudarakis et al., 2008        | South Europe          | High income                            | Prospective observational cohort                      | 20     | N | N | Y |
| Gokce et al., 2009              | Middle East           | Low, low-middle or upper-middle income | Retrospective observational cohort                    | 93     | Y | N | Y |
| Grijalva et al., 2011           | North America         | High income                            | Retrospective observational cohort (population based) | 130969 | N | N | Y |
| Hagos et al., 2016              | Africa                | Low, low-middle or upper-middle income | Retrospective observational cohort                    | 35     | Y | N | Y |
| Hajjar et al., 2016             | Middle East           | High income                            | Retrospective observational cohort                    | 63     | N | Y | Y |
| Hardavella et al., 2017         | South Europe          | High income                            | Retrospective observational cohort                    | 84     | N | Y | Y |
| Heimes et al., 2017             | North America         | High income                            | Retrospective observational cohort                    | 103    | N | Y | Y |
| Herrera-Kiengelher et al., 2010 | Central South America | Low, low-middle or upper-middle income | Retrospective observational cohort                    | 347    | N | Y | Y |
| Hooper et al., 2015             | North Europe          | High income                            | Randomised controlled trial                           | 35     | N | N | Y |
| Hoth et al., 2003               | North America         | High income                            | Retrospective observational cohort                    | 37     | Y | N | Y |
| Hsiao et al., 2017              | East Asia             | High income                            | Retrospective observational cohort                    | 33     | N | Y | Y |
| Hsieh et al., 2008              | East Asia             | High income                            | Retrospective observational cohort                    | 71     | Y | Y | Y |

|                               |               |                                        |                                    |     |   |   |   |
|-------------------------------|---------------|----------------------------------------|------------------------------------|-----|---|---|---|
| Huang et al., 2010            | East Asia     | Low, low-middle or upper-middle income | Retrospective observational cohort | 259 | Y | Y | Y |
| Jiménez et al., 2006          | South Europe  | High income                            | Prospective observational cohort   | 50  | N | N | Y |
| Kearney et al., 2000          | North Europe  | High income                            | Retrospective observational cohort | 50  | N | N | Y |
| Keeling et al., 2008          | North Europe  | High income                            | Retrospective observational cohort | 52  | N | N | Y |
| Khwaja et al., 2005           | North America | High income                            | Retrospective observational cohort | 21  | N | Y | Y |
| Kim et al., 2004              | East Asia     | High income                            | Retrospective observational cohort | 70  | Y | N | Y |
| Kim et al., 2014              | East Asia     | High income                            | Retrospective observational cohort | 127 | N | Y | N |
| Kim et al., 2016              | East Asia     | High income                            | Retrospective observational cohort | 158 | N | Y | Y |
| Koma et al., 2017             | East Asia     | High income                            | Retrospective observational cohort | 81  | N | Y | Y |
| Kundu et al., 2010            | India         | Low, low-middle or upper-middle income | Prospective observational cohort   | 46  | Y | Y | Y |
| Lardinois et al., 2005        | West Europe   | High income                            | Retrospective observational cohort | 328 | Y | N | Y |
| Lee et al., 2015              | East Asia     | High income                            | Prospective observational cohort   | 32  | N | Y | Y |
| Levinson and Pennington, 2007 | North America | High income                            | Retrospective observational cohort | 30  | N | Y | Y |
| Li et al., 2017               | East Asia     | Low, low-middle or upper-middle income | Retrospective observational cohort | 209 | N | N | Y |
| Lin et al., 2007              | East Asia     | High income                            | Retrospective observational cohort | 207 | Y | Y | Y |
| Lin et al., 2009              | East Asia     | High income                            | Diagnostic accuracy study          | 45  | N | Y | Y |
| Luh et al., 2005              | East Asia     | High income                            | Retrospective observational cohort | 234 | Y | Y | Y |
| Majid et al., 2016            | North America | High income                            | Retrospective observational cohort | 73  | N | Y | Y |
| Malhotra et al., 2007         | India         | Low, low-middle or upper-middle income | Prospective observational cohort   | 76  | Y | Y | Y |

|                                     |                       |                                        |                                    |     |   |   |                                           |
|-------------------------------------|-----------------------|----------------------------------------|------------------------------------|-----|---|---|-------------------------------------------|
| Petrusevska-Marinkovic et al., 2016 | East Europe           | Low, low-middle or upper-middle income | Retrospective observational cohort | 44  | N | Y | Y                                         |
| Marks et al., 2012                  | North Europe          | High income                            | Retrospective observational cohort | 406 | Y | Y | Y                                         |
| Marra et al., 2012                  | West Europe           | High income                            | Retrospective observational cohort | 61  | Y | Y | Y                                         |
| Maskell et al., 2005                | North Europe          | High income                            | Retrospective observational cohort | 430 | Y | Y | Y                                         |
| McClune et al., 2016                | North America         | High income                            | Retrospective observational cohort | 101 | Y | N | Y                                         |
| Medeiros et al., 2012               | Central South America | Low, low-middle or upper-middle income | Retrospective observational cohort | 52  | Y | Y | Y but excluded due to overlapping dataset |
| Mehta et al., 2016                  | North America         | High income                            | Prospective observational cohort   | 55  | N | Y | Y                                         |
| Melloni et al., 2004                | South Europe          | High income                            | Retrospective observational cohort | 40  | N | Y | Y                                         |
| Metaxas et al., 2007                | South Europe          | High income                            | Retrospective observational cohort | 106 | Y | N | Y                                         |
| Metin et al., 2010                  | Middle East           | Low, low-middle or upper-middle income | Retrospective observational cohort | 114 | Y | Y | Y                                         |
| Mikkola et al., 2010                | North Europe          | High income                            | Retrospective observational cohort | 143 | N | Y | Y                                         |
| Misthos et al., 2005                | South Europe          | High income                            | Randomised controlled trial        | 127 | N | N | Y                                         |
| Monteiro et al., 2011               | South Europe          | High income                            | Retrospective observational cohort | 27  | N | Y | Y                                         |
| Muhammad, 2012                      | Africa                | Low, Low-middle or Upper-middle income | Prospective observational cohort   | 69  | N | N | Y                                         |
| Nadir et al., 2007                  | Middle East           | Low, low-middle or upper-middle income | Retrospective observational cohort | 68  | Y | N | Y                                         |
| Nakamoto et al., 2016               | East Asia             | High income                            | Prospective observational cohort   | 20  | Y | Y | Y                                         |

|                                 |               |                                        |                                    |     |   |   |                                       |
|---------------------------------|---------------|----------------------------------------|------------------------------------|-----|---|---|---------------------------------------|
| Nakamura et al., 2010           | East Asia     | High income                            | Retrospective observational cohort | 31  | N | Y | Y                                     |
| Nandeesh et al., 2013           | India         | Low, Low-middle or Upper-middle income | Prospective observational cohort   | 40  | Y | N | Y                                     |
| Nielsen et al., 2011            | North Europe  | High income                            | Retrospective observational cohort | 158 | Y | Y | Y                                     |
| O'Connor et al., 2013           | North America | High income                            | Retrospective observational cohort | 125 | N | N | Y                                     |
| Ohuchi et al., 2014             | East Asia     | High income                            | Retrospective observational cohort | 29  | N | Y | Y                                     |
| Okada et al., 2000              | East Asia     | High income                            | Randomised controlled trial        | 24  | Y | N | Y                                     |
| Okiror et al., 2014             | North Europe  | High income                            | Retrospective observational cohort | 107 | N | Y | N                                     |
| Ozol et al., 2006               | Middle East   | Low, low-middle or upper-middle income | Retrospective observational cohort | 107 | N | Y | Y                                     |
| Park et al., 2016               | East Asia     | High income                            | Retrospective observational cohort | 421 | N | Y | N                                     |
| Petrakis et al., 2004           | South Europe  | High income                            | Retrospective observational cohort | 38  | N | N | Y                                     |
| Pilav et al., 2009              | East Europe   | Low, low-middle or upper-middle income | Retrospective observational cohort | 100 | N | N | Y                                     |
| Podbielski et al., 2000         | North America | High income                            | Retrospective observational cohort | 30  | N | N | Y                                     |
| Popowicz et al., 2017           | Australasia   | High income                            | Prospective observational cohort   | 61  | N | Y | Y                                     |
| Porcel et al., Lung 2017        | South Europe  | High income                            | Retrospective observational cohort | 62  | N | Y | Y but excluded as overlapping dataset |
| Porcel et al., Respiration 2017 | South Europe  | High income                            | Retrospective observational cohort | 90  | N | N | Y                                     |
| Potaris et al., 2007            | South Europe  | High income                            | Retrospective observational cohort | 122 | Y | Y | Y                                     |
| Powell et al., 2000             | North America | High income                            | Retrospective observational cohort | 70  | N | Y | Y                                     |

|                               |                       |                                        |                                                       |       |   |                                           |            |
|-------------------------------|-----------------------|----------------------------------------|-------------------------------------------------------|-------|---|-------------------------------------------|------------|
| Rahman et al., 2011           | North Europe          | High income                            | Randomised controlled trial                           | 210   | N | Y                                         | Y          |
| Ravaglia et al., 2012         | South Europe          | High income                            | Retrospective observational cohort                    | 41    | Y | N                                         | Y          |
| Roberts, 2003                 | North America         | High income                            | Retrospective observational cohort                    | 172   | Y | N                                         | Y          |
| Schweigert et al., 2016       | West Europe           | High income                            | Retrospective observational cohort                    | 335   | N | Y                                         | Y          |
| Shankar et al., 2000          | India                 | Low, low-middle or upper-middle income | Retrospective observational cohort                    | 103   | Y | Y                                         | Y          |
| Shen et al., 2012             | East Asia             | High income                            | Retrospective observational cohort                    | 26385 | N | Y but excluded due to overlapping dataset | Y included |
| Shin et al., 2013             | East Asia             | High income                            | Retrospective observational cohort                    | 111   | Y | Y                                         | Y          |
| Smolikov et al., 2006         | Middle East           | High income                            | Retrospective observational cohort                    | 71    | N | N                                         | Y          |
| Solaini et al., 2007          | South Europe          | High income                            | Retrospective observational cohort                    | 120   | Y | Y                                         | Y          |
| Søgaard et al., 2014          | North Europe          | High income                            | Retrospective observational cohort (population based) | 6878  | Y | Y                                         | N          |
| Soriano et al., 2005          | South Europe          | High income                            | Prospective observational cohort                      | 112   | N | Y                                         | Y          |
| Rodríguez Suárez et al., 2012 | South Europe          | High income                            | Retrospective observational cohort                    | 210   | N | Y                                         | Y          |
| Swart, 2002                   | Africa                | Low, low-middle or upper-middle income | Retrospective observational cohort                    | 77    | Y | Y                                         | Y          |
| Tantraworasin et al., 2018    | East Asia             | Low, low-middle or upper-middle income | Retrospective observational cohort                    | 328   | N | Y                                         | N          |
| Terra et al., 2012            | Central South America | Low, low-middle or upper-middle income | Retrospective observational cohort                    | 206   | Y | N                                         | Y          |
| Thommi et al., 2007           | North America         | High income                            | Retrospective observational cohort                    | 52    | N | N                                         | Y          |
| Thommi et al., 2012           | North America         | High income                            | Randomised controlled trial                           | 68    | N | Y                                         | Y          |

|                          |               |                                        |                                                       |       |   |   |   |
|--------------------------|---------------|----------------------------------------|-------------------------------------------------------|-------|---|---|---|
| Tsai et al., 2016        | East Asia     | High income                            | Retrospective observational cohort                    | 33    | Y | N | Y |
| Tsang et al., 2007       | East Asia     | High income                            | Retrospective observational cohort                    | 63    | N | Y | Y |
| Tsujimoto et al., 2015   | East Asia     | High income                            | Retrospective observational cohort                    | 36    | N | Y | N |
| Tuncozgun et al., 2001   | Middle East   | Low, low-middle or upper-middle income | Randomised controlled trial                           | 49    | N | N | Y |
| Vaziri and Abed, 2012    | Middle East   | Low, low-middle or upper-middle income | Retrospective observational cohort                    | 112   | Y | Y | Y |
| White et al., 2013       | North America | High income                            | Retrospective observational cohort                    | 187   | Y | Y | Y |
| Wong and Yap, 2016       | Australasia   | High income                            | Retrospective observational cohort                    | 108   | N | Y | Y |
| Wozniak et al., 2009     | North America | High income                            | Retrospective observational cohort                    | 104   | N | Y | Y |
| Wu et al., 2015          | East Asia     | High income                            | Retrospective observational cohort (population based) | 34250 | N | Y | N |
| Wurnig et al., 2006      | West Europe   | High income                            | Retrospective observational cohort                    | 130   | Y | N | Y |
| Yamaguchi et al., 2009   | East Asia     | High income                            | Retrospective observational cohort                    | 26    | Y | Y | Y |
| Pefura Yone et al., 2012 | Africa        | Low, low-middle or upper-middle income | Prospective observational cohort                      | 55    | N | Y | Y |

\* Where the same study reported both comorbidity and outcome data, if sample sizes differed the largest samples size is recorded.

**Supplementary table S2: comorbidities**

| <b>Comorbidity</b>                    | <b>Number of patients included in the analysis reported in studies from high income economies</b> | <b>Number of patients reported in studies from lower income economies</b> |
|---------------------------------------|---------------------------------------------------------------------------------------------------|---------------------------------------------------------------------------|
| Any comorbidity                       | 9417                                                                                              | 488                                                                       |
| Cardiac                               | 2269                                                                                              | 0                                                                         |
| Respiratory                           | 2495                                                                                              | 326                                                                       |
| Malignancy                            | 3393                                                                                              | 576                                                                       |
| Liver                                 | 4357                                                                                              | 503                                                                       |
| Current smoker                        | 2009                                                                                              | 406                                                                       |
| Alcohol excess                        | 3462                                                                                              | 743                                                                       |
| Chemotherapy                          | 735                                                                                               | 0                                                                         |
| Steroid therapy                       | 828                                                                                               | 46                                                                        |
| Asthma                                | 617                                                                                               | 642                                                                       |
| Chronic obstructive pulmonary disease | 37629                                                                                             | 928                                                                       |
| Congestive cardiac failure            | 35411                                                                                             | 320                                                                       |
| Ischaemic heart disease               | 35716                                                                                             | 78                                                                        |
| Hypertension                          | 36172                                                                                             | 639                                                                       |
| Diabetes mellitus                     | 40711                                                                                             | 1693                                                                      |
| Human Immunodeficiency virus          | 1709                                                                                              | 720                                                                       |
| Chronic Kidney Disease                | 4142                                                                                              | 542                                                                       |
| Stroke                                | 36076                                                                                             | 785                                                                       |

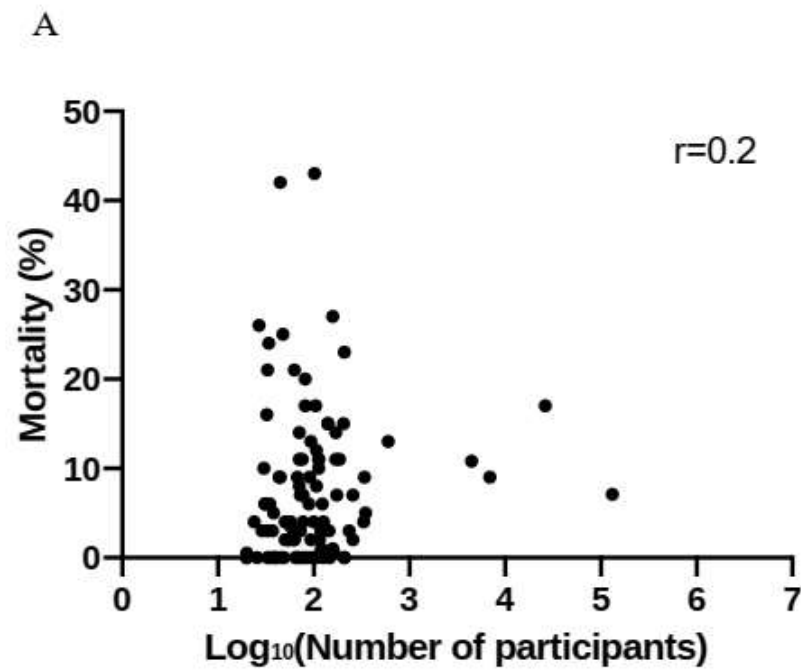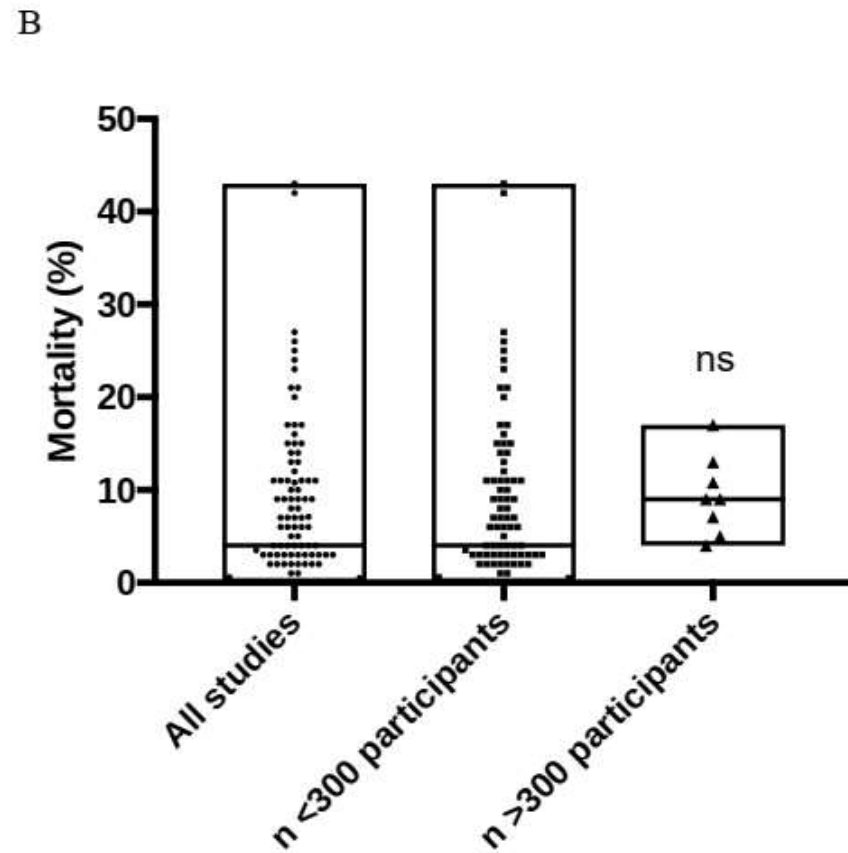

**Supplementary Figure S1: Percentage prevalence of in-hospital/30-day mortality of patients with pleural infection.** **A:** Correlation plot showing log transformed number of participants plotted against percentage mortality. Spearman rank  $r$  value shown,  $*$  =  $p < 0.05$ . **B:** Scatter plot showing percentage mortality for all included studies (left bar), studies with under 300 participants (middle bar) and over 300 participants (right bar). Median and range shown. Mann-Whitney test to compare median mortality of all included data sets with dataset with over 300 participants, ns = not significant
